# Supplementary material for: BODIPY-based colorimetric/ratiometric fluorescence probes for sulfite in aqueous solution and in living cells
Source: Royal Society of Chemistry journal article supplement (doi:10.1039/c5ra17962a), 2015-01-01
Supplement: c5ra17962a1.pdf [file c5ra17962a1.pdf]

# BODIPY-based colorimetric/ratiometric fluorescence probes for sulfite in aqueous solution and in living cells

Shanshan Liu,<sup>a</sup>Lun Song,<sup>a</sup> Qian Sun,<sup>a</sup>Zhaoyang Chen,<sup>a</sup> Yu Ge,<sup>b</sup>Weibing Zhang<sup>a</sup> and Junhong Qian<sup>\*a</sup>

<sup>a</sup>Shanghai Key Laboratory of Functional Materials Chemistry, School of Chemistry and Molecular Engineering, East China University of Science and Technology, Shanghai 200237, China

<sup>b</sup>Shanghai Institute of Quality Inspection and Technical Shanghai, 200233, China.

junhongqian@ecust.edu.cn

## Supporting Information

### Contents

|                                                                                |     |
|--------------------------------------------------------------------------------|-----|
| Experiment-----                                                                | S2  |
| NMR spectra of <b>M1</b> and <b>M2</b> -----                                   | S4  |
| NMR and ESI spectra of <b>M3</b> , <b>BSP1</b> and <b>BSP2</b> -----           | S5  |
| The absorption and emission spectra of <b>BSP1</b> in different solvents ----- | S11 |
| The concentration-dependent absorption spectra of <b>BSP1</b> in PBS -----     | S12 |
| Plot of fluorescence intensity vs. absorbance of <b>BSP1</b> -----             | S13 |
| $I_{554}/I_{618}$ vs. time of <b>BSP1</b> in the presence of sulfite-----      | S14 |
| The influence of pH value on $I_{554}/I_{618}$ of <b>BSP1</b> -----            | S15 |
| The concentration-dependent absorption spectra of <b>BSP2</b> in PBS -----     | S16 |
| The normalized absorption spectra of <b>BSP1</b> and <b>BSP2</b> -----         | S17 |
| Time-dependent absorption and emission spectra of <b>BSP2</b> in CTAB-PBS----- | S18 |
| Sulfite effect on the absorption spectrum of <b>BSP2</b> -----                 | S19 |

## Experiment

### Materials and reagents

All the commercial reagents and solvents (Aladdin Corporation) were of analytical grade and used without further purification. Ultra-pure water was prepared through a Sartorius Arium 611DI system. Phosphate salts were used to keep a stable pH and ion strength in detection systems. Absorption spectra were measured with an Evolution 220 UV-Visible spectrophotometer (Thermo Scientific). Fluorescence spectra were conducted on a Lumina Fluorescence Spectrometer (Thermo Scientific). All pH measurements were performed with a model FE20 meter purchased from Mettler Toledo. NMR spectra were recorded using a Bruker AV-400 spectrometer (400MHz). Mass spectra were performed with a MA 1212 Instrument using standard condition (ESI, 70 eV).

### Time titration of sulfite-probe systems

3 mM of the stock solutions of **BSP1** and **BSP2** in DMF were prepared ahead. The stock solution of **BSP1** or **BSP2** was diluted with PBS (20 mM, pH 7.4) with or without 1 mM CTAB to acquire  $1 \times 10^{-5}$  M dye aqueous solution. 50  $\mu$ L of 30 mM freshly prepared  $\text{Na}_2\text{SO}_3$  in PBS (20 mM, pH 7.4) were added to 3 mL of  $1 \times 10^{-5}$  M dye aqueous solution. Absorption and emission spectra of the above solution were collected at different intervals.

### Sulfite titration

0~50  $\mu$ L of 30 mM  $\text{Na}_2\text{SO}_3$  in PBS were added into 3 mL of  $1 \times 10^{-5}$  M **BSP1** in CTAB-PBS or **BSP2** in PBS solutions. The spectra were recorded 2 h and 20 min after each addition of sulfite to **BSP1** and **BSP2** solutions, respectively.

### HPLC traces

High-performance liquid chromatography (HPLC) spectra were carried out on an Agilent Technologies 1260 Infinity LC system. The mobile phases were degassed with an ultrasonic apparatus for 14 min. Mobile phase: A: water, B: acetonitrile; gradient elution: 2–8 min 10–95% B, 10–12 min 95–10% B; Isocratic elution: 0–2 min 10% B, 8–10 min 95% B, and 12–14 min 10% B. Injection volume: 10  $\mu$ L; flow rate: 1.0 mL/min; detection wavelength: isosbestic point 512 nm.

### **Live cell culture and fluorescence imaging**

HeLa cells were cultured in Dulbecco's modified Eagle's medium (DMEM) supplemented with 10% fetal bovine serum (FBS) in an atmosphere of 5% CO<sub>2</sub> and 95% air at 37 °C. The cells were washed with phosphate buffered solution (PBS, 20 mM, pH 7.4) and pre-incubated with 500 μM Na<sub>2</sub>SO<sub>3</sub>, then incubated with **BSP1** (10 μM) and CTAB (1 mM) in DMEM for 120 min at 37 °C and washed 3 times with PBS. For the control experiment, the cells were only incubated with 10 μM of **BSP1** and CTAB (1 mM) for 120 min. Cell imaging was carried out after washing the cells with PBS. Emission was collected at 500-550 nm for the green channel and at 570–620 nm for the red channel. The excitation wavelength was set at 514 nm for green and red channels.

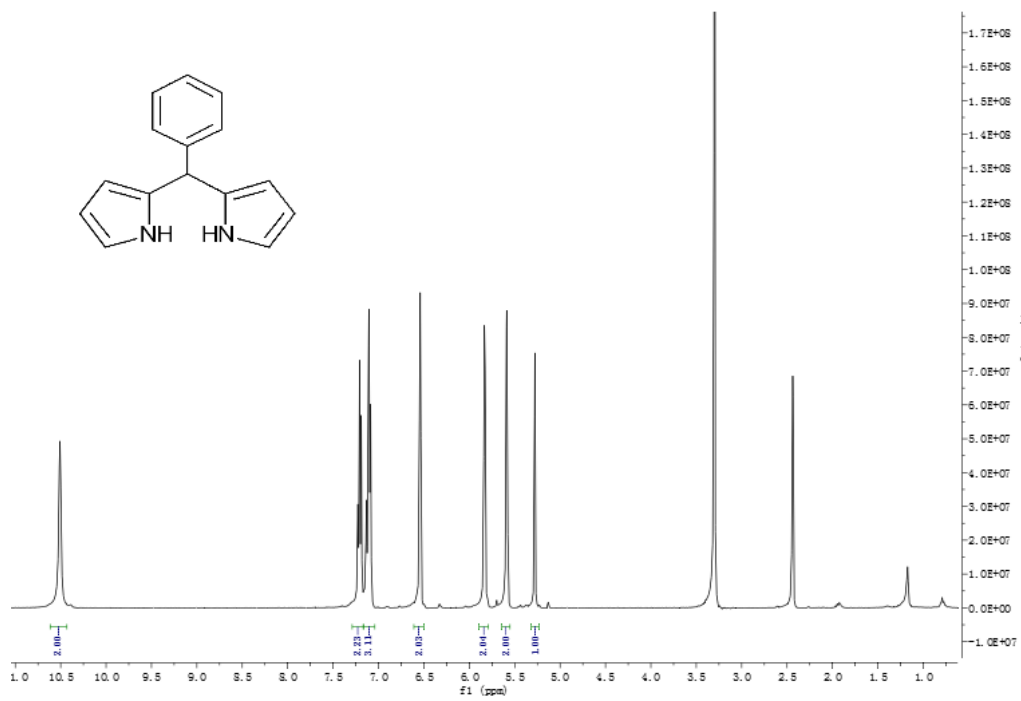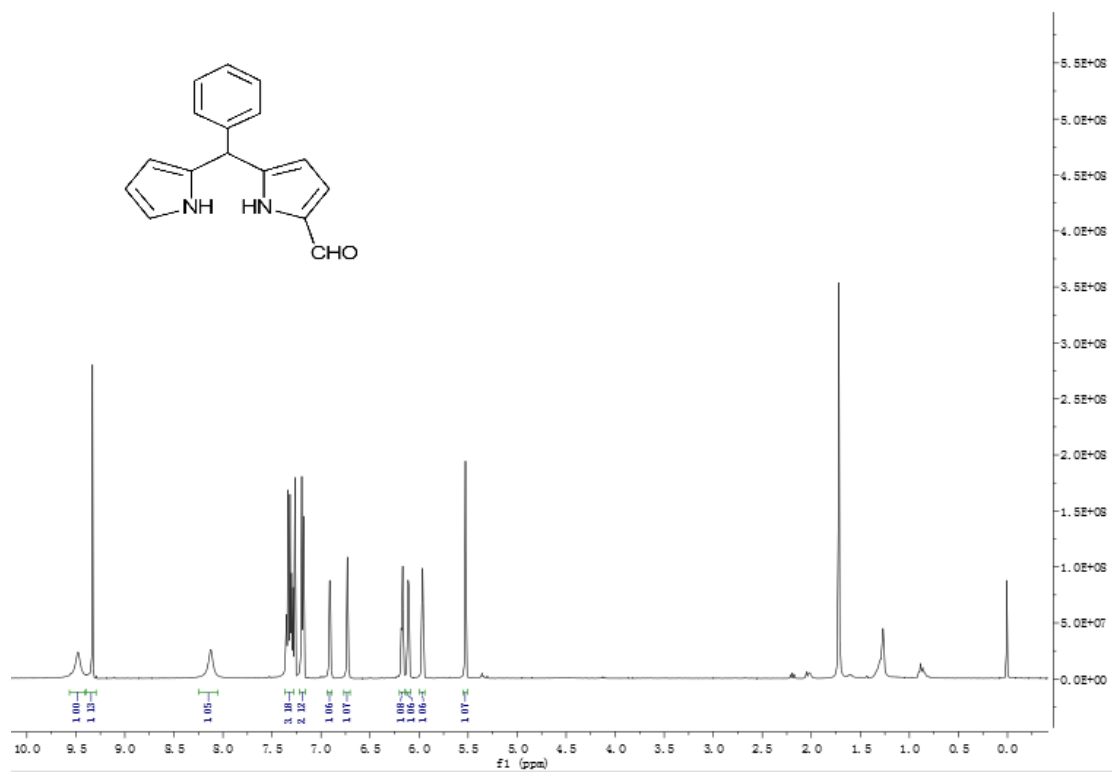

**Fig. S1**  $^1\text{H-NMR}$  spectra of M1 and M2.

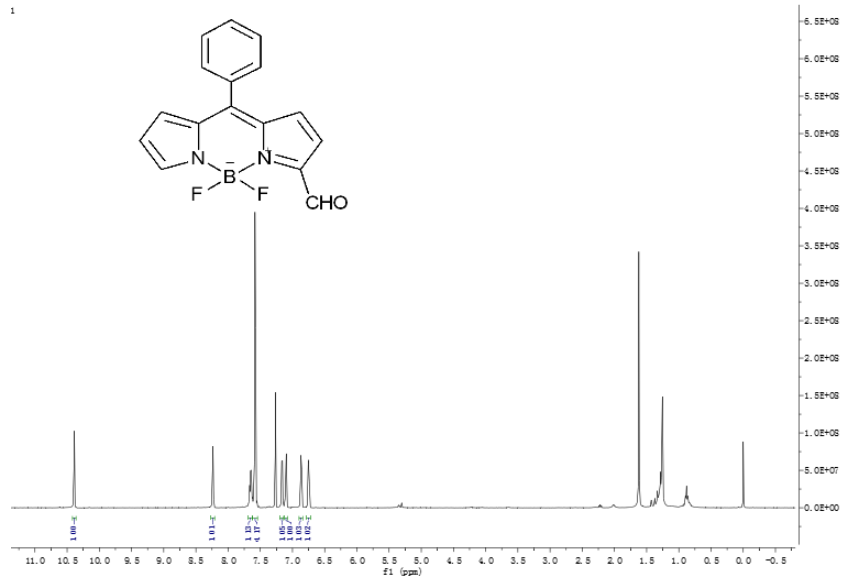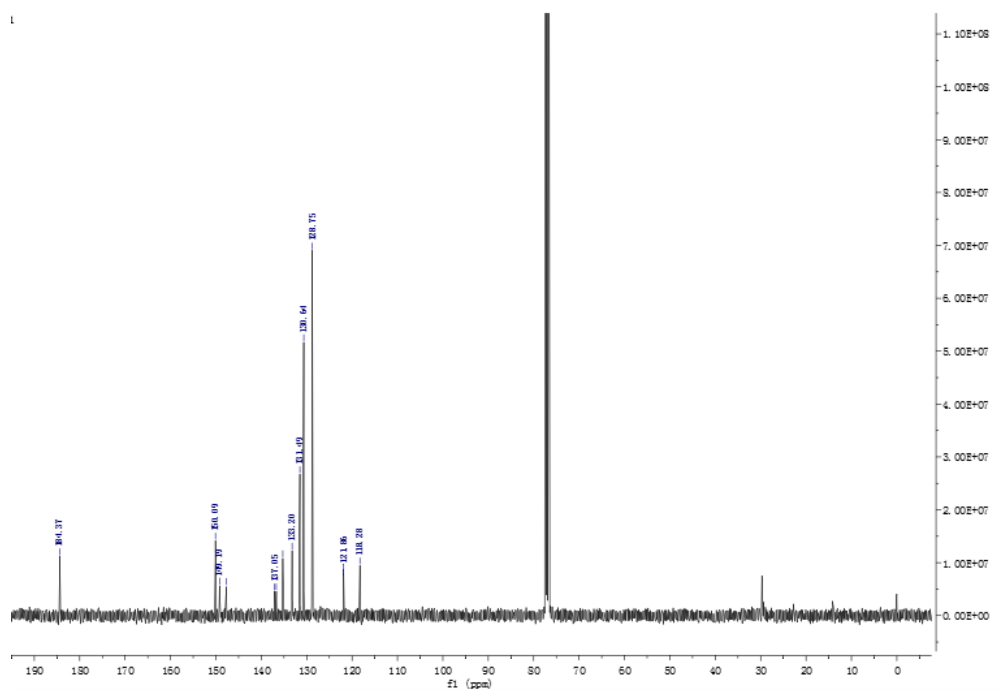

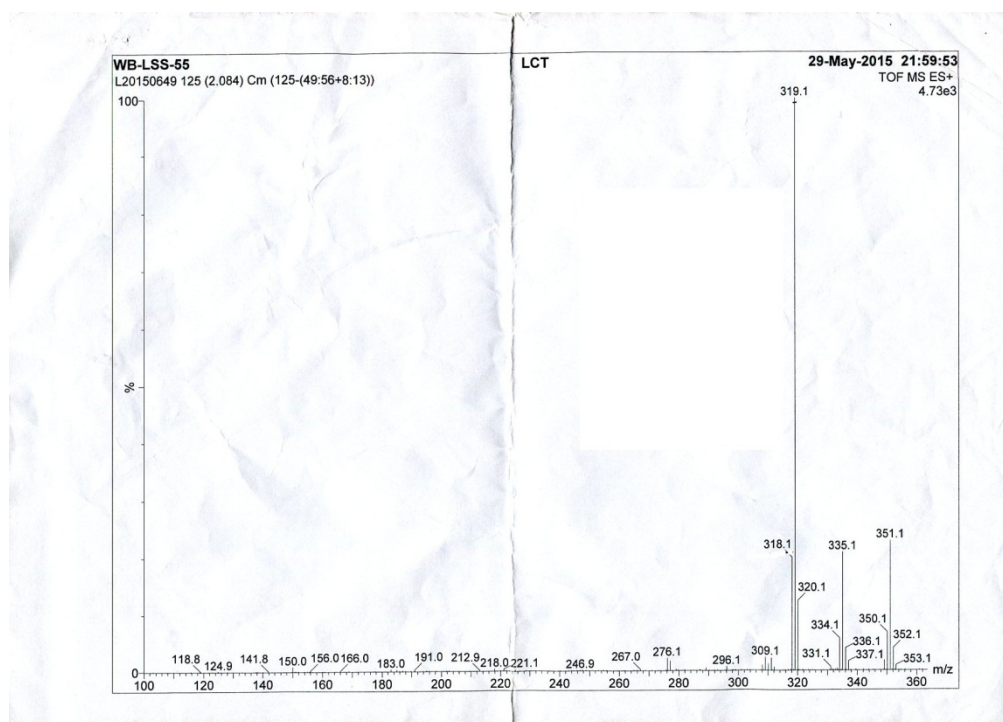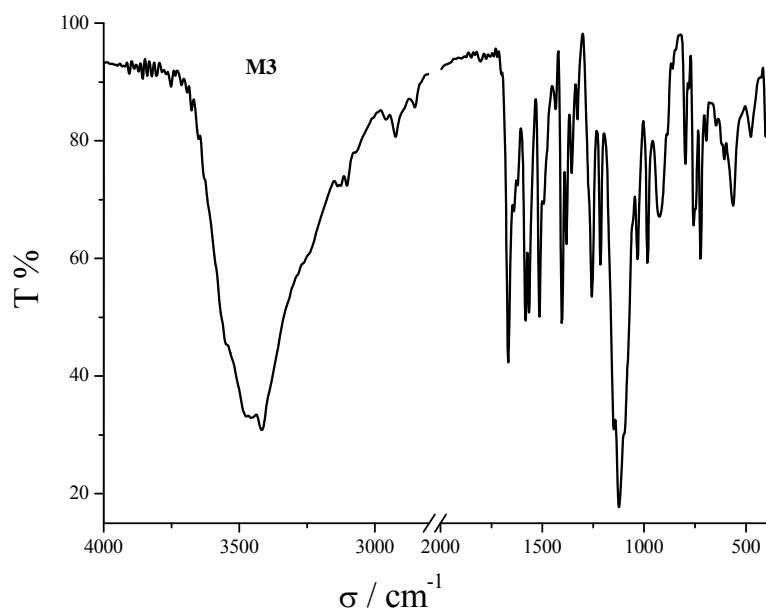

**Fig. S2**  $^1\text{H-NMR}$ ,  $^{13}\text{C-NMR}$ , MS and IR spectra of **M3**.

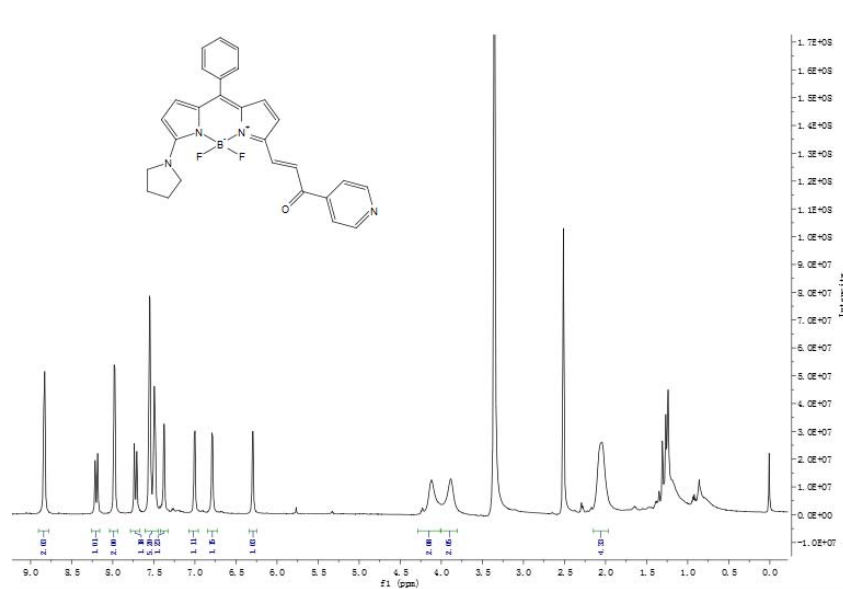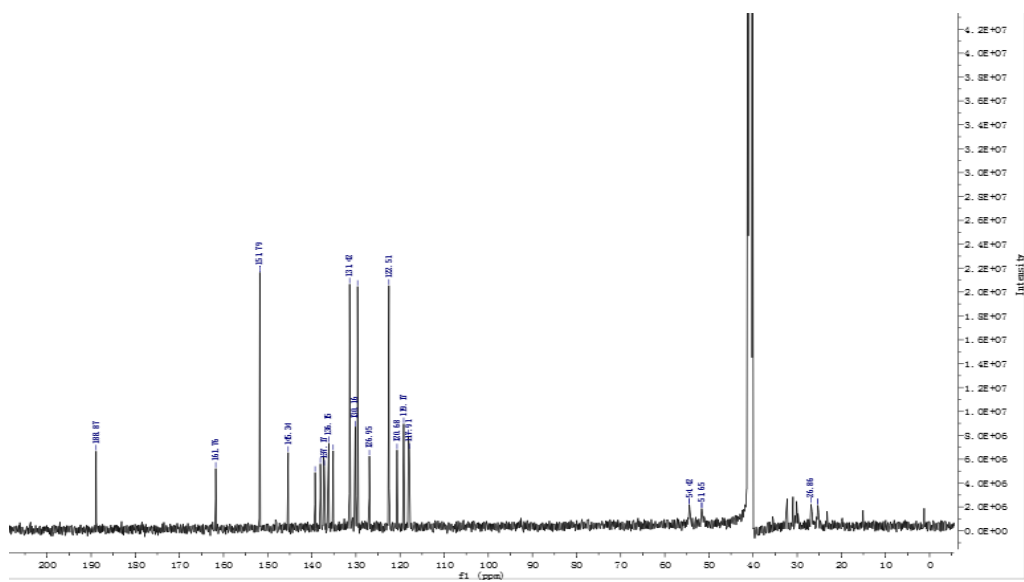

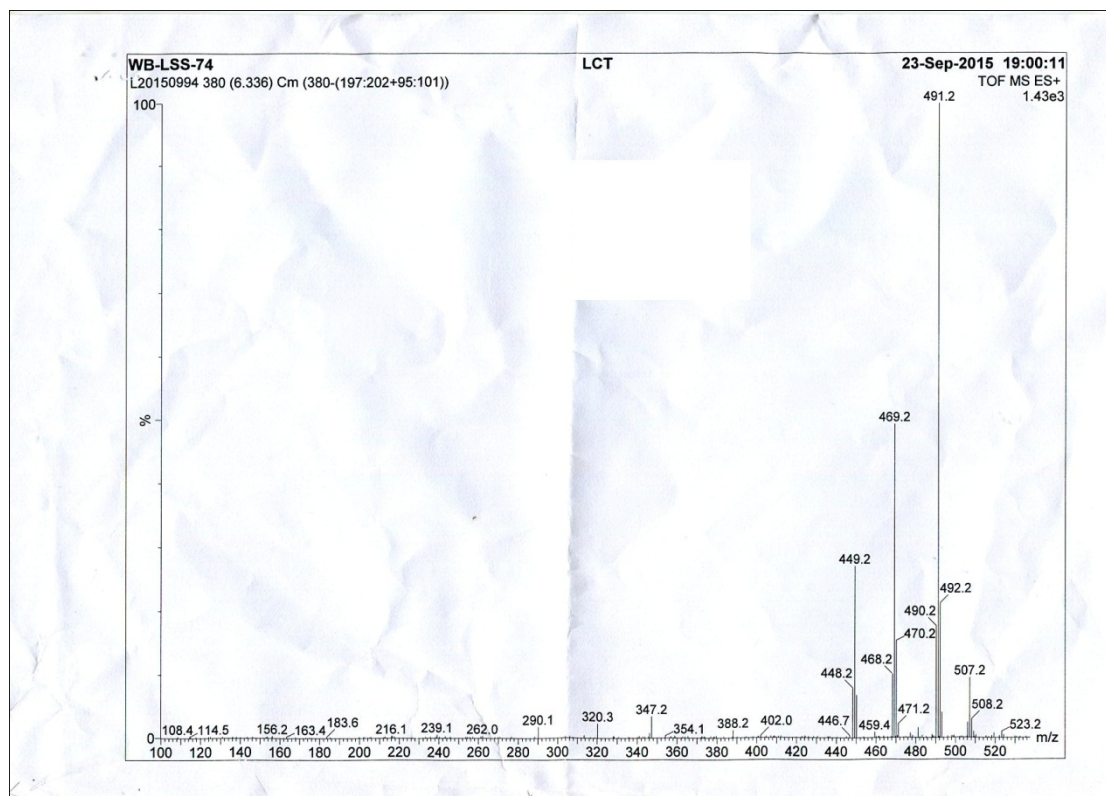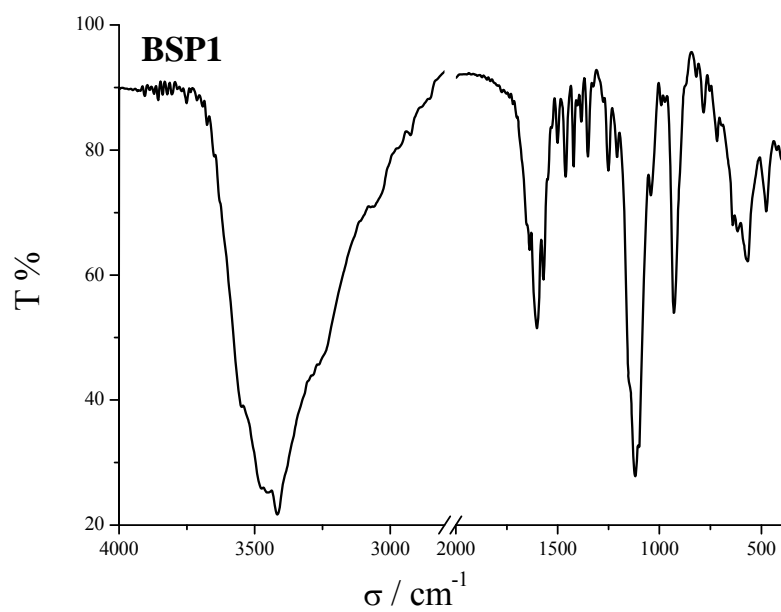

**Fig. S3**  $^1\text{H-NMR}$ ,  $^{13}\text{C-NMR}$ , MS and IR spectra of **BSP1**.



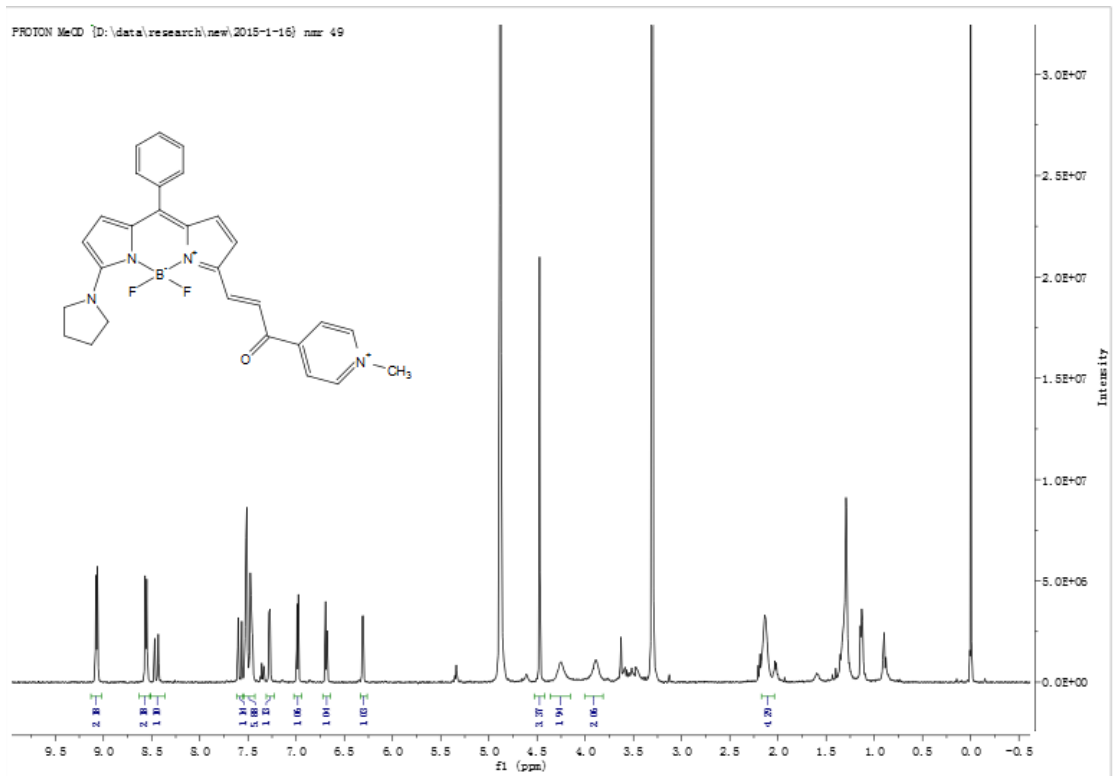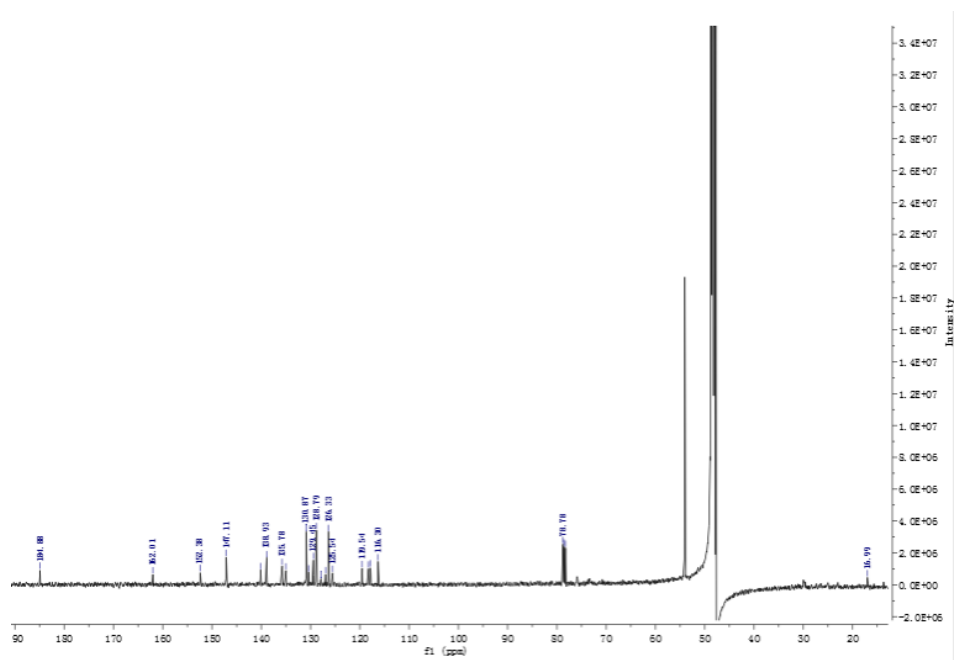

Monoisotopic Mass, Even Electron Ions  
205 formula(e) evaluated with 15 results within limits (up to 1 closest results for each mass)  
Elements Used:  
C: 0-35 H: 0-49 N: 0-4 O: 0-1 B: 0-1 F: 0-2

WB-ZHANG

ECUST institute of Fine Chem

12-Oct-2015

22:19:16

WB-LSS-73 46 (1.504) Cm (42:46)

1: TOF MS ES+  
2.33e+004

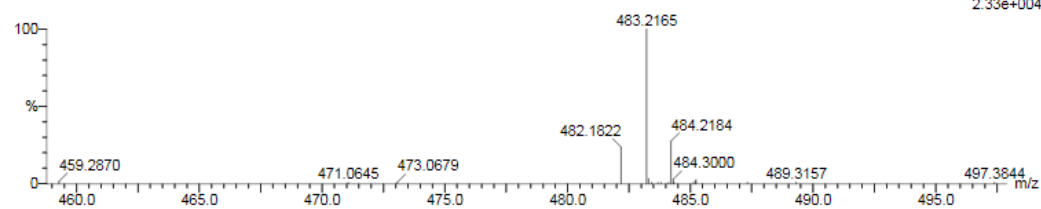

| Mass     | Calc. Mass | mDa  | PPM  | DBE  | i-FIT | i-FIT (Norm) | Formula           |
|----------|------------|------|------|------|-------|--------------|-------------------|
| 483.2165 | 483.2168   | -0.3 | -0.6 | 17.5 | 102.0 | 0.0          | C28 H26 N4 O B F2 |

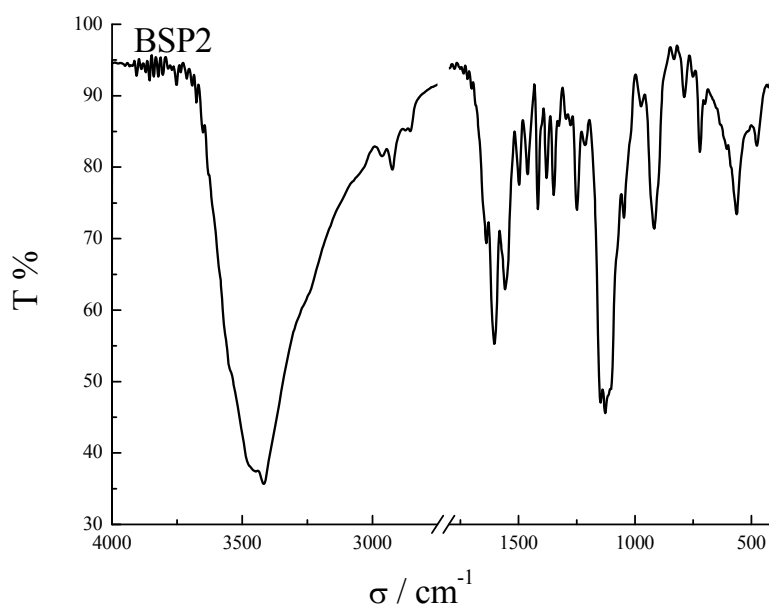

**Fig. S4**  $^1\text{H-NMR}$ ,  $^{13}\text{C-NMR}$ , MS and IR spectra of **BSP2**.

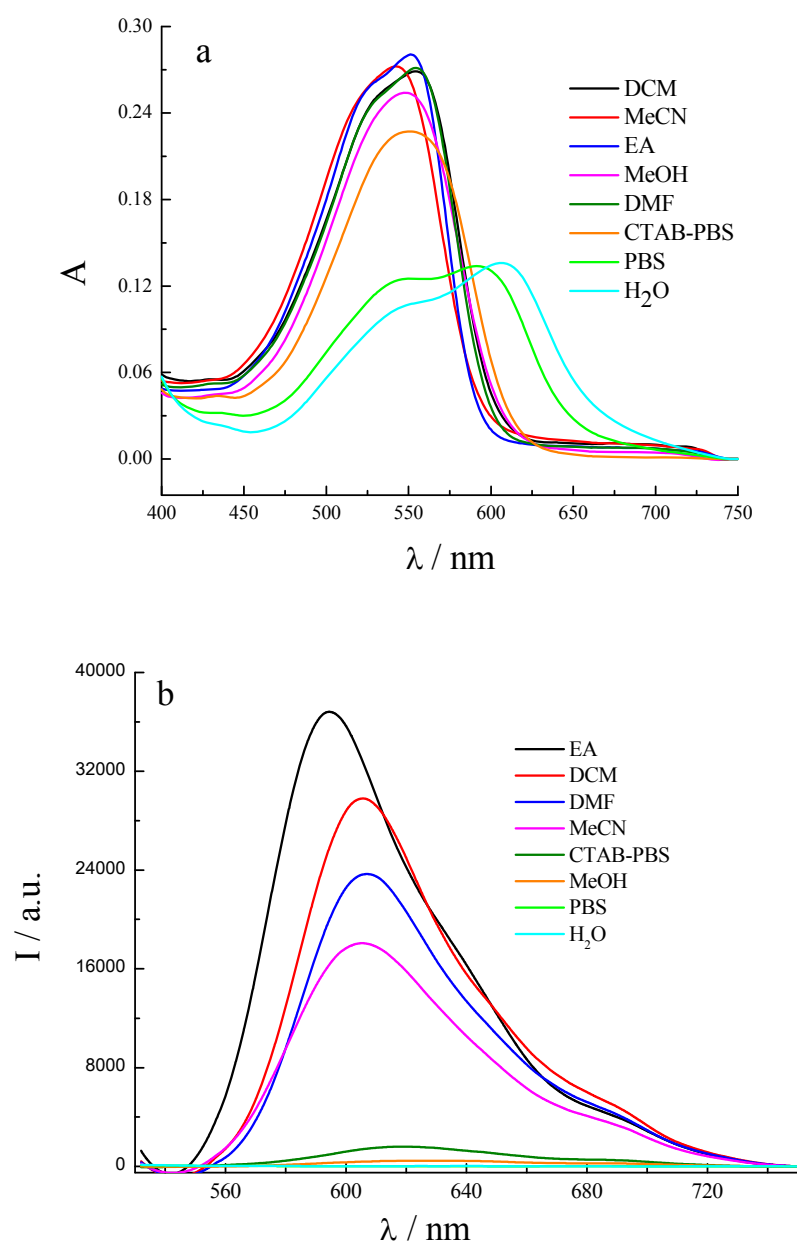

**Fig. S5** The absorption (a) and emission (b) spectra of **BSP1** (10  $\mu\text{M}$ ) in different solvents.

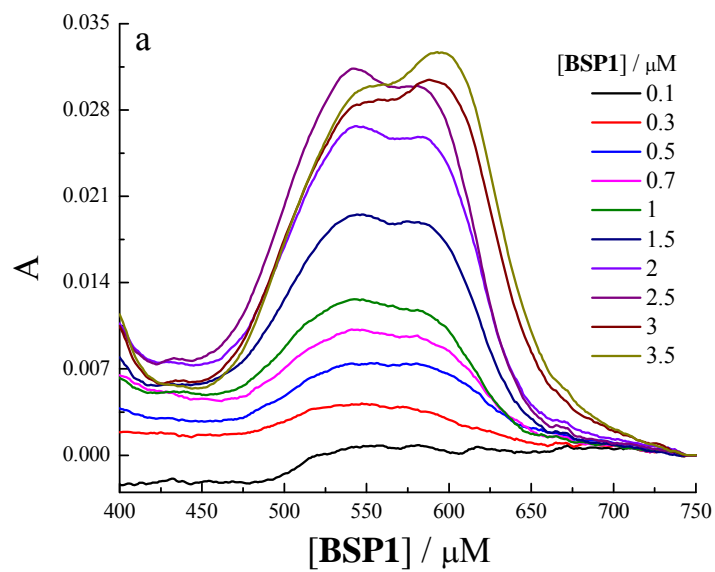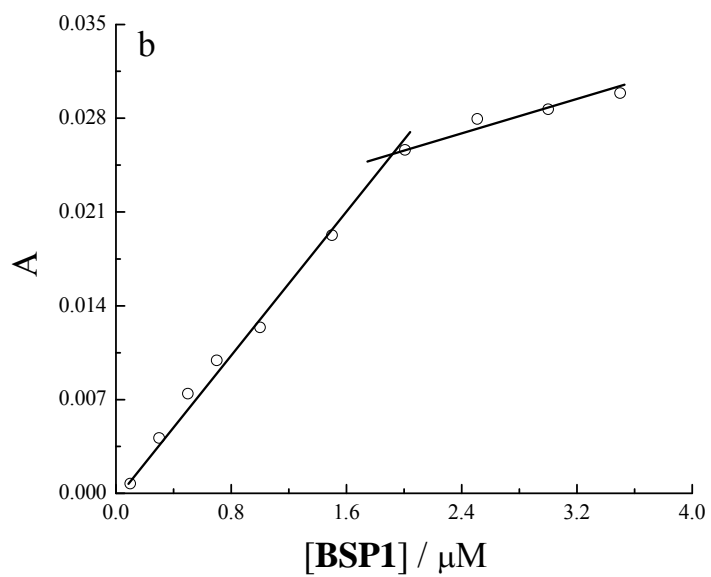

**Fig. S6** The absorption spectra of **BSP1** with different concentrations in PBS.

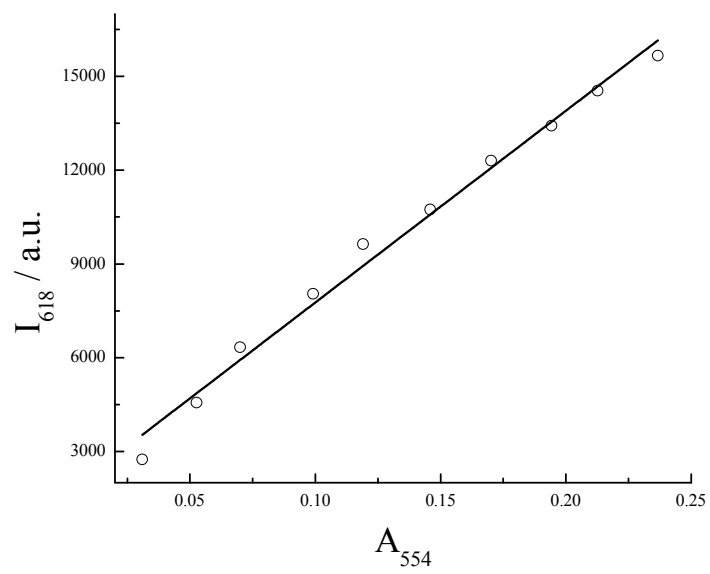

**Fig. S7** Plot of fluorescence intensity vs. absorbance of **BSP1**.

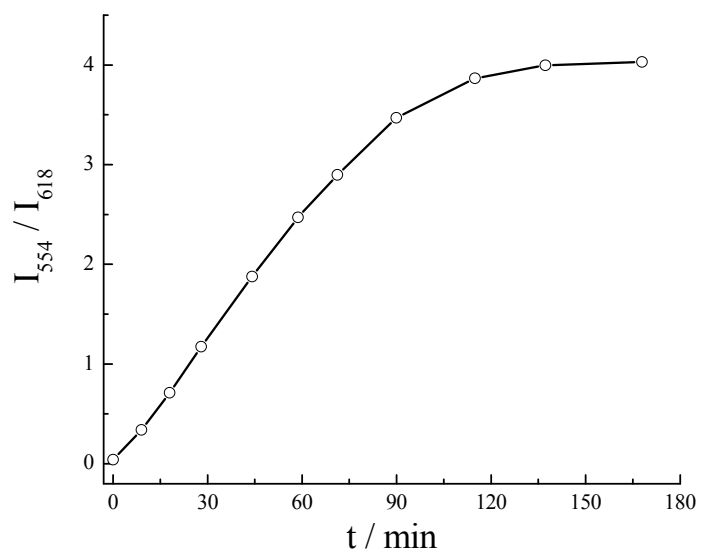

**Fig. S8**  $I_{554}/I_{618}$  vs. time of **BSP1**-sulfite system. [**BSP1**] = 10  $\mu\text{M}$ , [sulfite] = 500  $\mu\text{M}$ , 1 mM CTAB-PBS (20 mM, pH 7.4),  $\lambda_{\text{ex}}$  = 512 nm, 25°C.

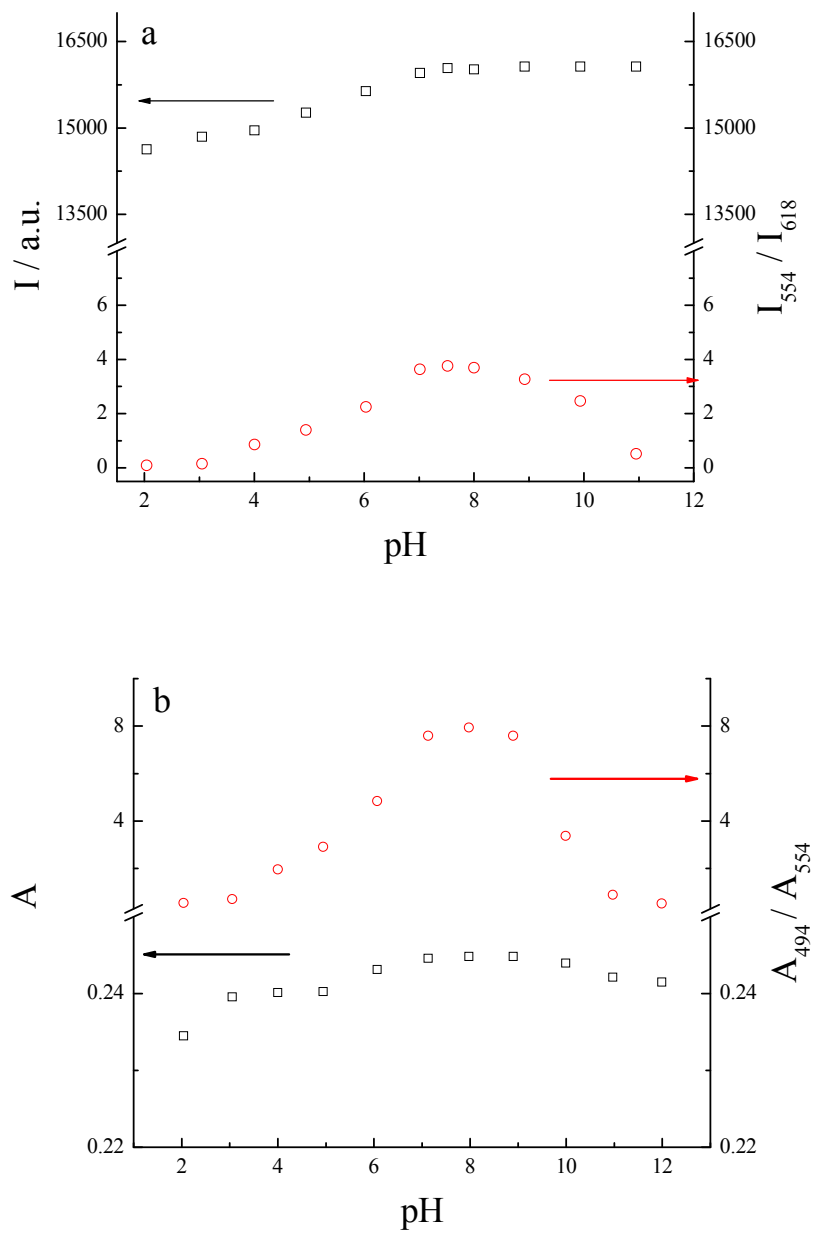

**Fig. S9** The effect of pH value on the fluorescence intensity of **BSP1** at 618 nm and  $I_{554}/I_{618}$  of **BSP1-SO<sub>3</sub>H** (a), and the absorbance of **BSP1** at 554 nm and  $A_{494}/A_{554}$  of **BSP1-SO<sub>3</sub>H** (b), 1 mM CTAB-PBS (20 mM).

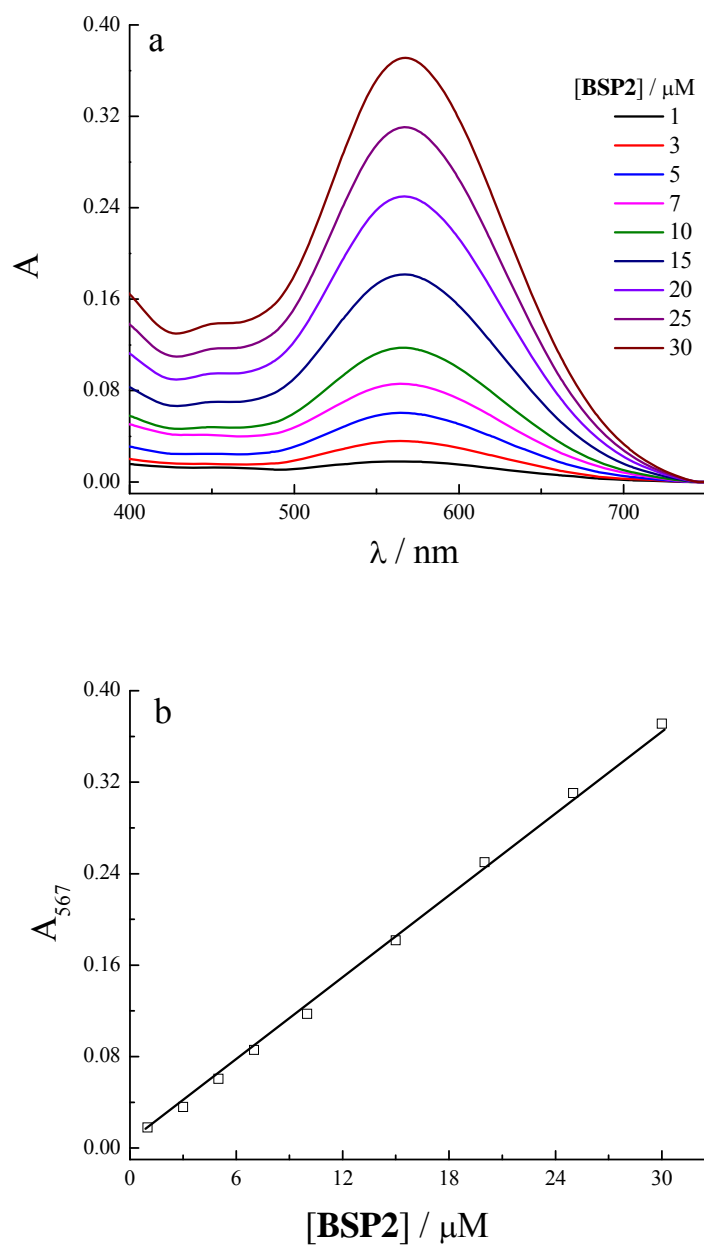

**Fig. S10** The absorption spectra of **BSP2** with different concentrations (1~30 $\mu\text{M}$ ) in PBS.



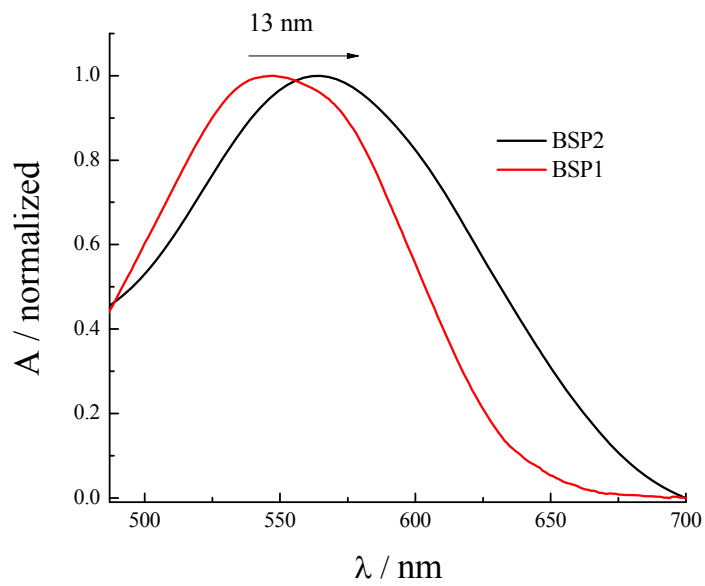

**Fig. S11** The normalized absorption spectra of **BSP1** and **BSP2**.

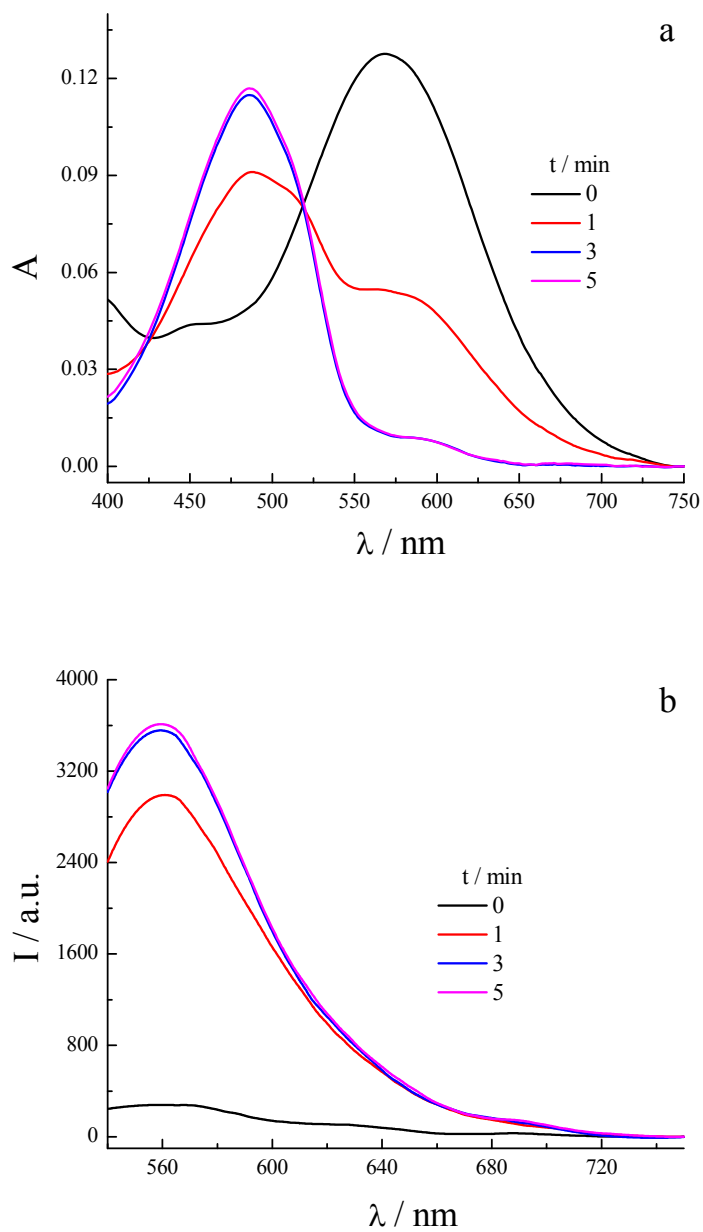

**Fig. S12** Time-dependent absorption (a) and emission (b) spectra of **BSP2** (10 μM) in the presence of 500 μM of sulfite in 1 mM CTAB-PBS (20 mM, pH 7.4) system,  $\lambda_{\text{ex}} = 520$  nm.

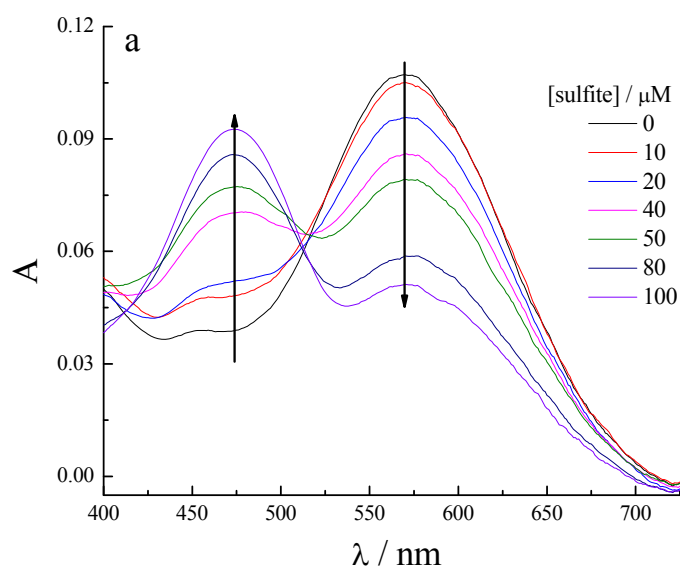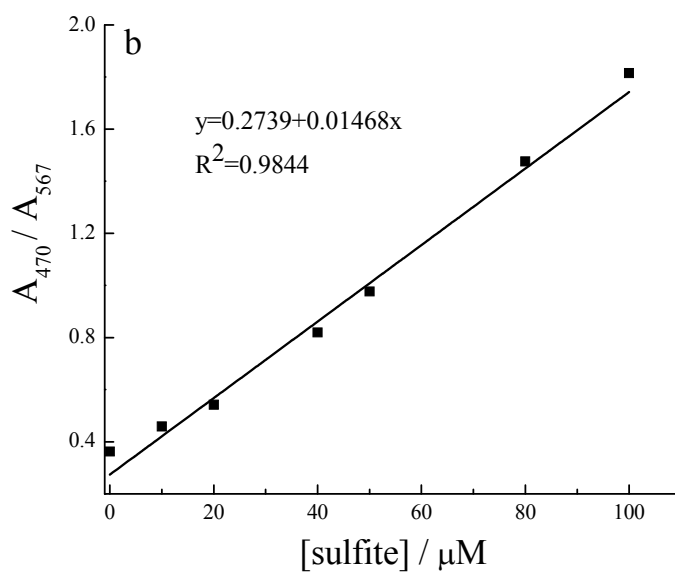

**Fig. S13** (a) The absorption spectra of **BSP2** with different concentrations of sulfite; (b) the absorbance ratio at 470 nm and 567 nm ( $A_{470} / A_{567}$ ) as a function of sulfite concentration. 20 mM PBS, pH 7.4, 25°C, [**BSP2**] = 10  $\mu\text{M}$ , recorded 20 min after each addition.
